# Supplementary material for: Response of plasma microRNAs to nusinersen treatment in patients with SMA
Source: PubMed Central journal article supplement (PMC9268869; doi:10.1002/acn3.51579), 2022-05-18

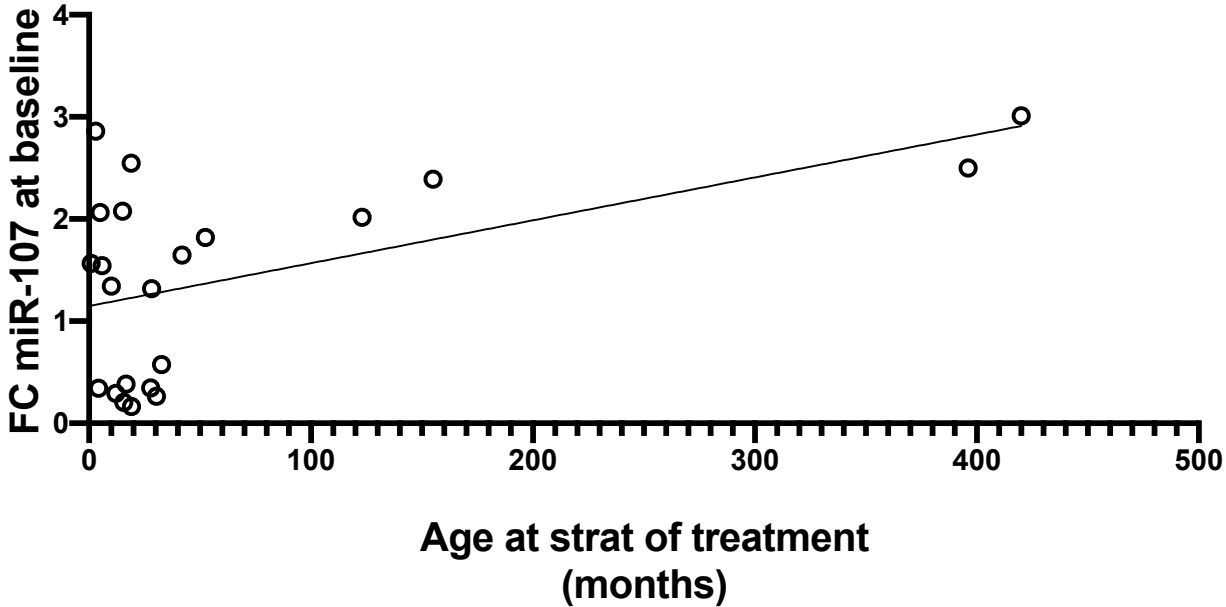

Supplement: ACN3-9-1011-s001.pdf [file ACN3-9-1011-s001.pdf]
